# Supplementary material for: Reference genome assemblies reveal the origin and evolution of allohexaploid oat
Source: Research Square preprint supplement (doi:10.21203/rs.3.rs-664692/v1), 2021-06-29
Supplement: Supplementary file 2 [file 32f58553063a5700f63ee0e1.xlsx]

## Sheet: Supplementary Table 1
	Supplementary Table 1 | The platform, and data size of sequencing.
	Species	Accession No.	Origin	Genome	NGS sequence 50~100× (Gb)	Accession (Bioproject, Biosample)	Nanopore ultra-long 100× (Gb)	Accession (Bioproject, Biosample)	Nanopore60× (Gb)	Accession (Bioproject, Biosample)	HiC 100× (Gb)	Accession (Bioproject, Biosample)	Iso-seq (Gb)	Accession (Bioproject, Biosample)	Equally mixed of seven RNA samples from various tissues at different growth stages (Gb)	Accession (Bioproject, Biosample)	Seven RNA samples from various tissues at different growth stages (>18G/sample)	Accession (Bioproject, Biosample)	Seedlings of plants in control conditions or exposed to heat, cold, drought, waterlogging, alkaline and salt (>18G/sample)	Accession (Bioproject, Biosample)
	A. longiglumis	CN58138	Oran, Algeria.	Al	599.84	PRJNA735443,SAMN19582558	-	-	-	-	-	-	-	-	11.68	PRJNA735431,SAMN19582112	-	-	-	-
	A. longiglumis	CN 58139	Libya	Al	204.68	PRJNA716144,SAMN19523931	-	-	268.74	PRJNA716144,SAMN18395928	-	-	25.74	PRJNA716144,SAMN19581877	10.41	PRJNA735431,SAMN19582113	-	-	-	-
	A. strigosa	CN 88610	New South Wales, Australia	As	208.17	PRJNA735443,SAMN19582559	-	-	-	-	-	-	-	-	11.82	PRJNA735431,SAMN19582114	-	-	-	-
	A. strigosa	CN 3065	Denmark	As	-		-	-	-	-	-	-	-	-	11.96	PRJNA735431,SAMN19582115	-	-	-	-
	A. nuda	CN 58062	Germany	As	200.98	PRJNA735443,SAMN19582560	-	-	-	-	-	-	-	-	11.87	PRJNA735431,SAMN19582116	-	-	-	-
	A. nuda	CN 79349	United Kingdom	As	-		-	-	-	-	-	-	-	-	10.41	PRJNA735431,SAMN19582117	-	-	-	-
	A. nuda	CN 79351	Netherlands	As	-		-	-	-	-	-	-	-	-	10.41	PRJNA735431,SAMN19582118	-	-	-	-
	A. canariensis	CN 23017	Canary Islands, Spain	Ac	220.51	PRJNA735443,SAMN19582561	-	-	-	-	-	-	-	-	11.89	PRJNA735431,SAMN19582119	-	-	-	-
	A. damascena	CN 19457	Syria	Ad	207.24	PRJNA735443,SAMN19582562	-	-	-	-	-	-	-	-	12.1	PRJNA735431,SAMN19582120	-	-	-	-
	A. wiestii	CN 90217	Giza, Egypt.	As	207.75	PRJNA735443,SAMN19582563	-	-	-	-	-	-	-	-	9.65	PRJNA735431,SAMN19582121	-	-	-	-
	A. clauda	CN 21388	Algeria	Cp	304.56	PRJNA735443,SAMN19582564	-	-	-	-	-	-	-	-	10.47	PRJNA735431,SAMN19582122	-	-	-	-
	A. ventricosa	CN 21405	Algeria	Cv	239.93	PRJNA735443,SAMN19582565	-	-	-	-	-	-	-	-	-	-	-	-	-	-
	A. insularis	CN 108634	Siliana, Tunisia	CD	404.97	PRJNA731599,SAMN19579880	-	-	481.39	PRJNA731599,SAMN19291344	816.93	PRJNA731599,SAMN19312172	49.94	PRJNA731599,SAMN19581879	-	-	-	-	-	-
	A. insularis	INS-4	Sicily, Gela, Italy	CD	397.45	PRJNA735443,SAMN19582566	-	-	-	-	-	-	-	-	-	-	-	-	-	-
	A. maroccana	CN 57945	Morocco	CD	419.4	PRJNA735443,SAMN19582567	-	-	-	-	-	-	-	-	-	-	-	-	-	-
	A. murphyi	CN 21989	Spain	CD	411.22	PRJNA735443,SAMN19582568	-	-	-	-	-	-	-	-	-	-	-	-	-	-
	A. barbata	CN 65538	Israel	AB	514.9	PRJNA735443,SAMN19582569	-	-	-	-	-	-	-	-	-	-	-	-	-	-
	A. agadiriana	CN 25869	Morocco	AB	401.92	PRJNA735443,SAMN19582570	-	-	-	-	-	-	-	-	-	-	-	-	-	-
	A. sativa ssp. nuda	Sanfensan	Shanxi, China	ACD	649.68	PRJNA727473,SAMN19582572	1260.3	PRJNA727473,SAMN19021785	-	-	1312.83	PRJNA727473,SAMN19340419	81.14	PRJNA727473,SAMN19581880	-	-	7tissues×3repeats	PRJNA727473,SAMN19582573	7trements×3repeats	PRJNA727473,SAMN19582574
	A. sativa	Ogle	Illinois, United States.	ACD	681.09	PRJNA735443,SAMN19582571	-	-	-	-	-	-	-	-	-	-	-	-	-	-
							是

## Sheet: Supplementary Table 2
Supplementary Table 2 | The statistics for each cell from the ONT read sequencing platform for the Avena species.
	Library ID	Total raw reads bases / bp	Total pass reads bases / bp	Total pass reads number	Pass reads mean length / bp	Pass reads max length / bp	Pass reads N50 length /bp	>10kb_ratio	>20kb_ratio	>40kb_ratio
A. sativa ssp. nuda cv. Sanfensan	20190620-YFL042-P1-PAD48636	26299530011	22950923691	1044601	21970	366589	45484	53.93	38.81	19.53
A. sativa ssp. nuda cv. Sanfensan	20190803-YFL042-P1-PAD65771	53251066156	46207019236	1527327	30253	414898	51182	72.24	51.81	25.97
A. sativa ssp. nuda cv. Sanfensan	20190806-YFL042-P1-PAD70228	24371727318	22091507252	816626	27052	500759	43565	71.65	48.34	21.84
A. sativa ssp. nuda cv. Sanfensan	20190807-YFL042-P1-PAD70228	21329985235	16816028094	708519	23734	370168	40339	65.54	42.38	18.28
A. sativa ssp. nuda cv. Sanfensan	20190809-YFL042-P1-PAD47228	27158783731	24547877037	897324	27356	316887	40005	76.39	54.55	22.02
A. sativa ssp. nuda cv. Sanfensan	20190809-YFL042-P1-PAD47369	26806118556	22484982479	705277	31881	407677	45799	81.02	61.07	27.12
A. sativa ssp. nuda cv. Sanfensan	20190809-YFL042-P5-PAD47395	19280139501	16758000591	625996	26770	582553	52789	62.06	43.85	21.91
A. sativa ssp. nuda cv. Sanfensan	20190810-YFL042-P1-PAD47228	17953435096	14007352783	560128	25007	308826	39858	68.88	47.5	19.31
A. sativa ssp. nuda cv. Sanfensan	20190810-YFL042-P1-PAD47369	18649795451	12918949621	424825	30410	431923	45269	78.01	57.92	25.76
A. sativa ssp. nuda cv. Sanfensan	20190810-YFL042-P5-PAD47395	25007360958	21717929790	1248626	17393	423814	35344	48.78	29.25	11.72
A. sativa ssp. nuda cv. Sanfensan	20190815-YFL042-P1-PAD66895	22023517937	18781563776	595701	31528	338804	48201	78.7	57.51	27.57
A. sativa ssp. nuda cv. Sanfensan	20190815-YFL042-P5-PAD68295	28389347886	21989550437	844146	26049	365136	36206	77.98	55.19	18.62
A. sativa ssp. nuda cv. Sanfensan	20190816-YFL042-P1-PAD66895	36905292119	29035266174	928160	31282	374123	48482	77.7	56.55	27.2
A. sativa ssp. nuda cv. Sanfensan	20190816-YFL042-P1-PAD67791	34775829068	27032616000	1051923	25698	269640	33092	82.13	56.62	16.78
A. sativa ssp. nuda cv. Sanfensan	20190816-YFL042-P1-PAD70115	29108754304	23024035944	714858	32207	398656	52505	75.85	55.83	28.26
A. sativa ssp. nuda cv. Sanfensan	20190816-YFL042-P5-PAD68295	5449591724	2075037284	76859	26997	387016	51398	63.86	46.18	22.92
A. sativa ssp. nuda cv. Sanfensan	20190817-YFL042-P1-PAD67791	11464616949	7382121002	315264	23415	237262	31469	76.87	50.98	14.22
A. sativa ssp. nuda cv. Sanfensan	20190817-YFL042-P1-PAD70115	12364232357	8757689759	307885	28444	395157	47934	70.76	49.89	23.81
A. sativa ssp. nuda cv. Sanfensan	20190821-YFL042-P1-PAD47255	21066288183	18859806147	626486	30104	449465	45976	77.94	55.5	25.74
A. sativa ssp. nuda cv. Sanfensan	20190821-YFL042-P1-PAD64688	21868763391	19756242124	651383	30329	393902	46425	78.12	56.19	26.21
A. sativa ssp. nuda cv. Sanfensan	20190822-YFL042-P1-PAD47255	13740899483	11815335554	407775	28975	352535	44807	76.27	54.02	24.65
A. sativa ssp. nuda cv. Sanfensan	20190822-YFL042-P1-PAD64688	18682922786	16106814006	721344	22328	290628	30662	74.92	44.64	13.29
A. sativa ssp. nuda cv. Sanfensan	20190830-YFL042-P1-PAD79132	20776176249	17660765537	553812	31889	408599	49200	78.17	58.3	29.78
A. sativa ssp. nuda cv. Sanfensan	20190830-YFL042-P1-PAD80679	25120035607	22524489087	945696	23817	373660	37777	69.16	44.22	17.92
A. sativa ssp. nuda cv. Sanfensan	20190831-YFL042-P1-PAD79132	17765247527	14087503843	637444	22099	309612	37814	62.78	40.49	16.72
A. sativa ssp. nuda cv. Sanfensan	20190831-YFL042-P1-PAD80679	17770159770	14689120157	669982	21924	335353	36954	63.42	40.34	16.27
A. sativa ssp. nuda cv. Sanfensan	20190903-YFL042-P1-PAD76340	16642893938	15165473116	590317	25690	473974	44536	66.35	44.6	21.07
A. sativa ssp. nuda cv. Sanfensan	20190903-YFL042-P1-PAD80936	22540051822	19844988131	1305214	15204	366724	37068	36.01	23.09	10.73
A. sativa ssp. nuda cv. Sanfensan	20190904-YFL042-P1-PAD76340	11171069896	9876817236	437517	22574	375913	40254	61.38	39.17	17.26
A. sativa ssp. nuda cv. Sanfensan	20190904-YFL042-P1-PAD80936	16776720304	14237942680	1007757	14128	346739	34877	34.28	21.57	9.61
A. sativa ssp. nuda cv. Sanfensan	20190906-YFL042-P1-PAD78932	20834328798	17660026657	624165	28293	375554	41340	78.12	54.63	22.84
A. sativa ssp. nuda cv. Sanfensan	20190906-YFL042-P1-PAD81153	18222885666	14668483612	502560	29187	450763	44330	76.94	54.08	24
A. sativa ssp. nuda cv. Sanfensan	20190907-YFL042-P1-PAD78932	14549175398	11292978064	400979	28163	391488	42388	76.25	53.39	22.88
A. sativa ssp. nuda cv. Sanfensan	20190907-YFL042-P1-PAD81153	12805803967	8556341032	323759	26428	365535	41545	71.96	49.13	20.8
A. sativa ssp. nuda cv. Sanfensan	20190918-YFL042-P1-PAD78767	18954255185	16469382047	495884	33212	415681	53075	77.35	57.98	30.96
A. sativa ssp. nuda cv. Sanfensan	20190918-YFL042-P1-PAD80468	18868890190	16348355773	461350	35435	386705	56033	79.3	60.88	33.68
A. sativa ssp. nuda cv. Sanfensan	20190919-YFL042-P1-PAD80318	18157222349	14960333736	417008	35875	402797	56998	79.31	61.38	34.31
A. sativa ssp. nuda cv. Sanfensan	20190919-YFL042-P1-PAD80468	10686495611	8977717176	274596	32694	353559	54195	75.03	56.52	30.46
A. sativa ssp. nuda cv. Sanfensan	20190920-YFL042-P1-PAD80318	12054247693	9054449187	358971	25223	371408	47371	62.73	42.81	21.1
A. sativa ssp. nuda cv. Sanfensan	20190923-YFL042-P1-PAD76204	3283798203	1775130407	37703	47081	448611	76551	83.9	68.48	42.99
A. sativa ssp. nuda cv. Sanfensan	20190923-YFL042-P1-PAD78755	13821460680	11929000425	267413	44608	576905	71861	83.71	67.67	40.94
A. sativa ssp. nuda cv. Sanfensan	20190924-YFL042-P1-PAD78755	1220897520	1023341616	111003	9219	535877	26534	23.5	12.04	4.76
A. sativa ssp. nuda cv. Sanfensan	20190925-YFL042-P1-PAD77220	12933459257	11562085260	344216	33589	462309	56502	74.64	55.44	29.75
A. sativa ssp. nuda cv. Sanfensan	20190925-YFL042-P1-PAD78755	5734750851	4525100135	109469	41336	544529	68751	80.31	63.62	37.62
A. sativa ssp. nuda cv. Sanfensan	20190925-YFL042-P1-PAD81521	14832508766	11579775070	298457	38798	631342	65771	77.48	60.48	35.11
A. sativa ssp. nuda cv. Sanfensan	20190926-YFL042-P1-PAD76482	22560915724	19931653452	510587	39036	500281	64352	80.76	61.02	33.9
A. sativa ssp. nuda cv. Sanfensan	20190926-YFL042-P1-PAD76611	15852894459	13412578591	464436	28879	506063	50139	70.77	47.12	23.49
A. sativa ssp. nuda cv. Sanfensan	20190926-YFL042-P1-PAD77220	6001434697	5055539293	209437	24138	341964	45553	60.55	40.51	19.14
A. sativa ssp. nuda cv. Sanfensan	20190926-YFL042-P1-PAD81521	8689414349	6393252597	212640	30066	519488	57658	65.64	47.77	25.68
A. sativa ssp. nuda cv. Sanfensan	20190926-YFL042-P1-PAE03743	24346428156	18470066266	549697	33600	410138	44296	86.18	68.17	27.95
A. sativa ssp. nuda cv. Sanfensan	20190927-YFL042-P1-PAD76482	17388240022	14872802373	416335	35723	442242	61630	75.67	56.87	31.41
A. sativa ssp. nuda cv. Sanfensan	20190927-YFL042-P1-PAD76611	10050090989	7941875840	280878	28275	468718	50398	68.75	46.62	23.7
A. sativa ssp. nuda cv. Sanfensan	20190927-YFL042-P1-PAE03743	17586256778	9766282747	384767	25382	349549	38241	72.22	50.05	18.97
A. sativa ssp. nuda cv. Sanfensan	20190928-YFL042-P1-PAD76482	5704632374	4823087770	160244	30098	459106	54379	69.99	48.3	25.54
A. sativa ssp. nuda cv. Sanfensan	20190928-YFL042-P1-PAD76892	20302439477	18086306472	558553	32380	437147	52149	76.06	56.14	28.42
A. sativa ssp. nuda cv. Sanfensan	20190928-YFL042-P1-PAD78763	13296864171	9447778688	179870	52525	705717	104682	77.62	62.34	41.59
A. sativa ssp. nuda cv. Sanfensan	20190928-YFL042-P1-PAD79145	15679392590	12974171229	312446	41524	600023	79425	74.33	56.89	34.24
A. sativa ssp. nuda cv. Sanfensan	20190928-YFL042-P1-PAD98754	21491074404	17804258414	559039	31847	429084	50349	76.52	55.99	27.82
A. sativa ssp. nuda cv. Sanfensan	20190928-YFL042-P1-PAE03741	12120653191	11042259147	203812	54178	705424	132363	72.87	56.79	37.83
A. sativa ssp. nuda cv. Sanfensan	20190928-YFL042-P5-PAD76183	16820579977	11466016012	401382	28566	438144	40717	78.49	57.55	22.98
A. sativa ssp. nuda cv. Sanfensan	20190928-YFL042-P5-PAD81673	16826184392	13382734583	376493	35545	358672	46178	86.66	72.76	30.14
A. sativa ssp. nuda cv. Sanfensan	20190928-YFL042-P5-PAD98917	34793311203	31065467076	1064404	29185	357262	37272	82.8	64.83	21.42
A. sativa ssp. nuda cv. Sanfensan	20190929-YFL042-P1-PAD76892	14890944373	12859571994	423048	30397	410845	51253	71.93	52.27	26.18
A. sativa ssp. nuda cv. Sanfensan	20190929-YFL042-P1-PAD78763	10502558575	7086149943	137148	51667	542115	104344	76.44	61.46	40.66
A. sativa ssp. nuda cv. Sanfensan	20190929-YFL042-P1-PAD79145	11274762260	8557603458	180885	47309	697466	93399	75.37	59.84	38.09
A. sativa ssp. nuda cv. Sanfensan	20190929-YFL042-P1-PAD81673	12447440550	7260145397	204029	35583	368192	49038	83.43	70.12	30.85
A. sativa ssp. nuda cv. Sanfensan	20190929-YFL042-P1-PAD98754	12651454483	8923169651	343986	25940	416761	51776	60.55	44.91	22.76
A. sativa ssp. nuda cv. Sanfensan	20190929-YFL042-P1-PAE03741	9102766059	8156734304	122992	66319	654312	143332	78.05	64.95	47.42
A. sativa ssp. nuda cv. Sanfensan	20190929-YFL042-P5-PAD76183	6719000030	3225520659	118671	27180	1381974	39667	75.91	54.74	21.29
A. sativa ssp. nuda cv. Sanfensan	20190929-YFL042-P5-PAD94181	25123855127	21930658668	724176	30283	384810	38900	83.4	65.91	22.97
A. sativa ssp. nuda cv. Sanfensan	20190930-YFL042-P5-PAD94181	16602119768	10311489663	386657	26668	353230	39488	74.65	53.61	20.82
Hexaploid	Total	1260296241625	1027833423052	36462917	28188	1381974	46261	70.61	50.46	22.96
A. longiglumis_CN 58139	20190427-NPL0900-P1-A9-D9	39799307053	33141703931	1321391	25080	214746	32352	87.24	51.44	16.78
A. longiglumis_CN 58139	20190430-NPL0900-P1-A5-D5	31185298640	26735785926	1117215	23930	223266	30385	86.48	48.6	14.55
A. longiglumis_CN 58139	20190505-NPL0900-P1-A3-D3	28823865507	23240825479	894287	25988	267380	34454	86.52	52.34	18.91
A. longiglumis_CN 58139	20190505-NPL0900-P2-A7-D7	32225852623	25247982003	962099	26242	289068	34756	86.93	52.83	19.3
A. longiglumis_CN 58139	20190505-NPL0900-P2-E7-H7	37317449378	30177002122	1149720	26247	270411	34487	87.38	53.09	19.16
A. longiglumis_CN 58139	20190508-NPL0900-P2-E5-H5	23265945105	18062302555	810312	22290	196233	28504	83.51	42.98	12.5
A. longiglumis_CN 58139	20190508-NPL0900-P2-E9-H9	45330965285	35335569804	1575823	22423	244262	28671	83.95	43.53	12.61
A. longiglumis_CN 58139	20190510-NPL0900-P1-1-A11-D11	30792916268	26727868271	1092746	24459	303279	32306	85.12	48.08	16.46
Diploid	Total	268741599859	218669040091	8923593	24504	303279	31907	85.88	48.96	16.13
A. insularis_CN 108634	20190427-NPL0899-P1-E3-H3	76424816857	62370611463	2685953	23221	207494	29480	85.84	46.94	13.45
A. insularis_CN 108634	20190428-NPL0899-P1-E9-H9	54620009832	30111146515	1294345	23263	197261	29791	85.13	46.8	13.75
A. insularis_CN 108634	20190428-NPL0899-P2-A3-D3	57265936725	38528976101	1653436	23302	222405	29632	85.86	46.89	13.69
A. insularis_CN 108634	20190428-NPL0899-P2-A9-D9	87630516690	73540874167	3161748	23259	245666	30056	84.42	47.13	13.92
A. insularis_CN 108634	20190428-NPL0899-P2-E3-H3	73569152109	58898595664	2523786	23337	188161	30173	84.69	47.41	14.06
A. insularis_CN 108634	20190429-NPL0899-P2-A7-D7	89689298825	76184543467	3404887	22375	246528	28610	82.88	44.38	12.35
A. insularis_CN 108634	20190429-NPL0899-P2-E7-H7	42190094063	35138965780	1492978	23536	210376	30855	83.26	46.55	14.76
Tetraploid	Total	481389825101	374773713157	16217133	23109	246528	29688	84.47	46.46	13.58

## Sheet: Supplementary Table 7
Supplementary Table 7 | Non-coding genes predicted on each of the three reference genomes.
Type		Number			Average length (bp)			Total length (bp)			Percentage of sequence (%)
		A	CD	SFS	A	CD	SFS	A	CD	SFS	A	CD	SFS
rRNA	18s	34	114	206	1943.94	1812.39	1813.9	66094	206613	373663	0.0018	0.0027	0.0035
	28s	26	98	187	4018.15	3968.12	4000.99	104472	388876	748186	0.0028	0.0052	0.007
	5.8s	1	20	17	156	153.25	152.12	156	3065	2586	0	0	0
	5s	549	1077	4976	114.45	114.51	115.19	62833	123331	573204	0.0017	0.0016	0.0053
small RNA	snRNA	626	1472	2142	106.43	106.64	106.64	66625	156973	228425	0.0018	0.0021	0.0021
	miRNA	13035	34540	47815	136.07	136.38	136.34	1773718	4710459	6519278	0.0475	0.0626	0.0606
	spliceosomal RNA	165	329	491	151.75	153.09	153.17	25039	50366	75206	0.0007	0.0007	0.0007
	other	22	63	88	202.09	205.16	201.58	4446	12925	17739	0.0001	0.0002	0.0002
Regulatory RNA	cis-regulatory elements	145	109	282	42.51	41.64	43.88	6164	4539	12373	0.0002	0.0001	0.0001
tRNA	tRNA	1103	2460	3712	75.15	75.34	75.39	82886	185340	279861	0.0022	0.0025	0.0026
Total		15706	40282	59916	6946.54	6766.52	6799.2	2192433	5842487	8830521	0.0588	0.0777	0.0821
A: A. longiglumis; CD: A. insularis, ACD: SFS.
